# Supplementary material for: Scrolling reduced graphene oxides to induce room temperature magnetism via spatial coupling of defects
Source: Royal Society of Chemistry journal article supplement (doi:10.1039/d3mh00734k), 2023-01-01
Supplement: d3mh00734k1.pdf [file d3mh00734k1.pdf]

1

## Supporting Information

2 **Scrolling reduced graphene oxides to induce room temperature magnetism via**

3 **spatial coupling of defects**

4 Ting Shi<sup>1</sup>, Yuan Yao<sup>1\*</sup>, Yang Hong<sup>1</sup>, Yang Li<sup>1</sup>, Songtao Lu<sup>1</sup>, Wei Qin<sup>2</sup> and Xiaohong

5 Wu<sup>1\*</sup>

6 <sup>1</sup>MIIT Key Laboratory of Critical Materials Technology for New Energy Conversion

7 and Storage, School of Chemistry and Chemical Engineering, Harbin Institute of

8 Technology, Harbin, Heilongjiang 150001, P. R. China.

9 <sup>2</sup>School of Materials Science and Engineering, Harbin Institute of Technology, Harbin,

10 Heilongjiang 150001, P. R. China.

11 \*E-mail: yyuan@hit.edu.cn (Y.Y.); wuxiaohong@hit.edu.cn (X.W.)

12

13

14 The Supporting Information file includes:

15 Fig. S1 to S34

16 Note S1 to S4

17 Table S1 to S5

18 References

19

|    |                                                                                                       |             |
|----|-------------------------------------------------------------------------------------------------------|-------------|
| 20 | <b>Contents</b>                                                                                       | <b>Page</b> |
| 21 | <b>Fig. S1</b> SEM image of GO                                                                        | S5          |
| 22 | <b>Fig. S2</b> SEM image of original GO nanoscrolls                                                   | S5          |
| 23 | <b>Fig. S3</b> XRD of NaOH and original GO nanoscrolls                                                | S5          |
| 24 | <b>Fig. S4</b> TEM images of DR-rGO nanoscrolls-350 and DR-rGO nanoscrolls-750                        | S5          |
| 25 | <b>Fig. S5</b> N <sub>2</sub> adsorption-desorption profiles, pore size distribution and CIELAB color |             |
| 26 | variable values of DR-rGO nanoscrolls-X                                                               | S6          |
| 27 | <b>Fig. S6</b> 3D laser confocal scanning images of DR-rGO nanoscrolls-X                              | S6          |
| 28 | <b>Fig. S7</b> 3D laser confocal scanning images and the roughness line profiles of DR-rGO            |             |
| 29 | nanoscrolls-X                                                                                         | S7          |
| 30 | <b>Fig. S8</b> The arithmetic mean height (Sa) of DR-rGO nanoscrolls-X                                | S7          |
| 31 | <b>Fig. S9</b> TEM images of CNTs before and after washing                                            | S8          |
| 32 | <b>Fig. S10</b> UV-Vis spectra of GO suspension with different content of NaOH                        | S8          |
| 33 | <b>Note S1.</b> Derjaguin-Landau-Verwey-Overbeek (DLVO) theory                                        | S9          |
| 34 | <b>Fig. S11</b> FTIR spectra of GO-based aerogels, Zeta potential and DLVO interaction                |             |
| 35 | profiles of GO sheets under different contents of NaOH                                                | S10         |
| 36 | <b>Fig. S12</b> SEM images of aerogels under different contents of NaOH                               | S10         |
| 37 | <b>Fig. S13</b> Reaction mechanism for decarboxylation of GO under mild alkaline                      |             |
| 38 | conditions                                                                                            | S11         |
| 39 | <b>Fig. S14</b> SEM images of aerogel through refrigerator freezing                                   | S11         |
| 40 | <b>Note S2.</b> Electron paramagnetic resonance (EPR) spectra and Brillouin function                  | S12         |
| 41 | <b>Fig. S15</b> <i>M-T</i> , <i>R-T</i> , <i>R-H</i> , and MR curves of DR-rGO nanoscrolls-550        | S13         |

|    |                                                                                            |     |
|----|--------------------------------------------------------------------------------------------|-----|
| 42 | <b>Fig. S16</b> $M-H$ curves of DR-rGO nanoscrolls-550 and CNTs used to be involved in     |     |
| 43 | nanoscrolls                                                                                | S14 |
| 44 | <b>Fig. S17</b> Spin density of DR-rGO nanoscrolls-550 from EPR spectrometer, $M-H$ curves |     |
| 45 | fitted by the Brillouin function for DR-rGO nanoscrolls-X, spin density of DR-rGO          |     |
| 46 | nanoscrolls-X from the Brillouin fits                                                      | S15 |
| 47 | <b>Fig. S18</b> High-resolution C1s XPS spectra, content changes of C=C, C-C, C-O-H, and   |     |
| 48 | C=O and FTIR spectra for DR-rGO nanoscrolls-X, Raman of original GO nanoscrolls            | S15 |
| 49 | <b>Fig. S19</b> SEM images of DR-rGO nanosheets-550                                        | S17 |
| 50 | <b>Fig. S20</b> $M-H$ of DR-rGO nanoscrolls-550 and DR-rGO nanosheets-550, ZFC/FC          |     |
| 51 | curves of DR-rGO nanosheets-550                                                            | S17 |
| 52 | <b>Note S3.</b> DFT calculation details                                                    | S18 |
| 53 | <b>Fig. S21</b> DFT calculation model                                                      | S19 |
| 54 | <b>Fig. S22</b> DOS and distribution of spin density for different defective graphene and  |     |
| 55 | DOS, distribution of spin density and electron localization function for pristine          |     |
| 56 | graphene                                                                                   | S19 |
| 57 | <b>Fig. S23</b> Partial densities of states                                                | S20 |
| 58 | <b>Fig. S24</b> The distribution of spin density for different configurations              | S20 |
| 59 | <b>Fig. S25</b> Calculation model for top view of defective bilayer graphene               | S20 |
| 60 | <b>Note S4.</b> Electromagnetic wave absorption                                            | S21 |
| 61 | <b>Fig. S26</b> 2D RL of DR-rGO nanoscrolls-X                                              | S22 |
| 62 | <b>Fig. S27</b> 3D RL of original GO nanoscrolls and DR-rGO nanosheets-550                 | S22 |
| 63 | <b>Fig. S28</b> The dielectric/magnetic loss tangent of DR-rGO nanoscrolls-X               | S22 |

|    |                                                                                    |     |
|----|------------------------------------------------------------------------------------|-----|
| 64 | <b>Fig. S29</b> The permeability of DR-rGO nanoscrolls-X                           | S23 |
| 65 | <b>Fig. S30</b> Eddy current loss of DR-rGO nanoscrolls-X                          | S23 |
| 66 | <b>Fig. S31</b> The permittivity of DR-rGO nanoscrolls-X                           | S23 |
| 67 | <b>Fig. S32</b> Electric conductivity of DR-rGO nanoscrolls-X                      | S24 |
| 68 | <b>Fig. S33</b> The Cole-Cole curves of DR-rGO nanoscrolls-X                       | S24 |
| 69 | <b>Fig. S34</b> Electron localization function of defective graphene               | S24 |
| 70 | <b>Table S1.</b> Experiments with different contents of NaOH                       | S25 |
| 71 | <b>Table S2.</b> Comparison of magnetic properties toward graphene-based materials | S25 |
| 72 | <b>Table S3.</b> ICP-MS of DR-rGO nanoscrolls-X                                    | S26 |
| 73 | <b>Table S4.</b> Comparison of EMW absorption performance                          | S27 |
| 74 | <b>Table S5.</b> Performance comparison of graphene-based dielectric materials     | S28 |
| 75 | <b>References</b>                                                                  | S29 |
| 76 |                                                                                    |     |

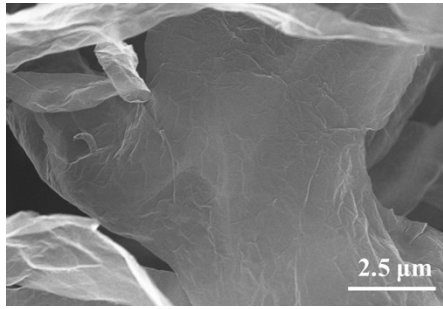

77

78 **Fig. S1** SEM image of GO.

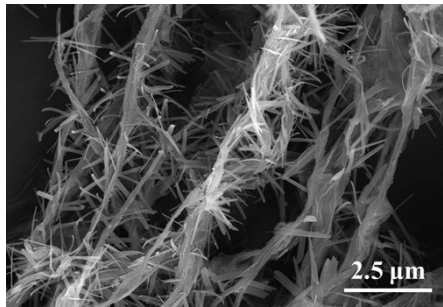

79

80 **Fig. S2** SEM image of original GO nanoscrolls.

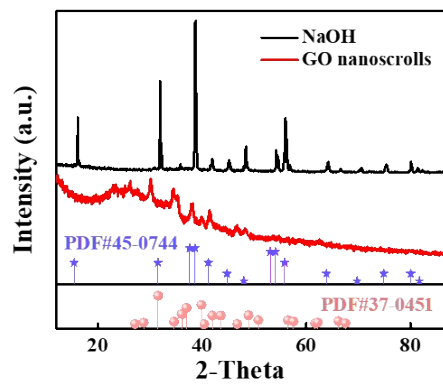

81

82 **Fig. S3** XRD patterns of NaOH and original GO nanoscrolls.

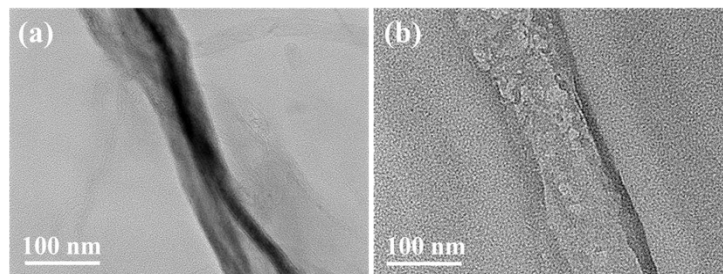

83

84 **Fig. S4** TEM images of (a) DR-rGO nanoscrolls-350 and (b) DR-rGO nanoscrolls-750.

85

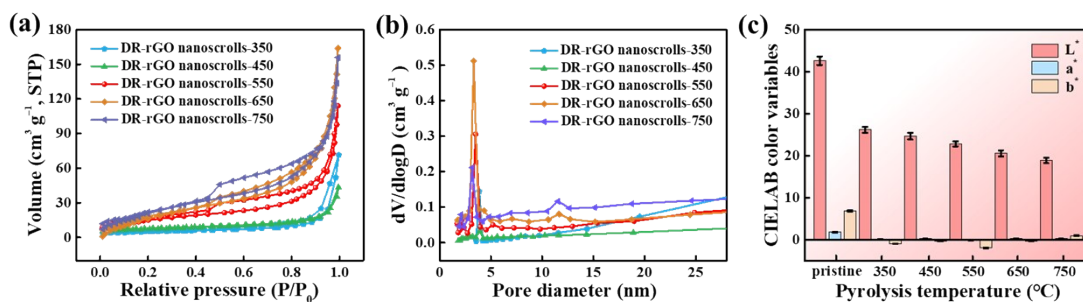

86

87 **Fig. S5** (a)  $N_2$  adsorption-desorption profiles, (b) pore size distributions, (c) CIELAB color variable values of DR-

88 rGO nanoscrolls-X (X=350, 450, 550, 650 and 750), respectively. The error bars represent the standard deviation of

89 the measured data and reflect the measurement accuracy.

90 The CIELAB color variables (*i.e.*,  $L^*$ ,  $a^*$ , and  $b^*$ ) exhibited a certain change as the

91 increase of pyrolysis temperature. Among them, brightness factor ( $L^*$ ) for DR-rGO

92 nanoscrolls-750 changed from 42.6 (original GO nanoscrolls) to 18.8, implying an

93 increase in surface blackness and reduction degree during elevated pyrolysis

94 temperature.

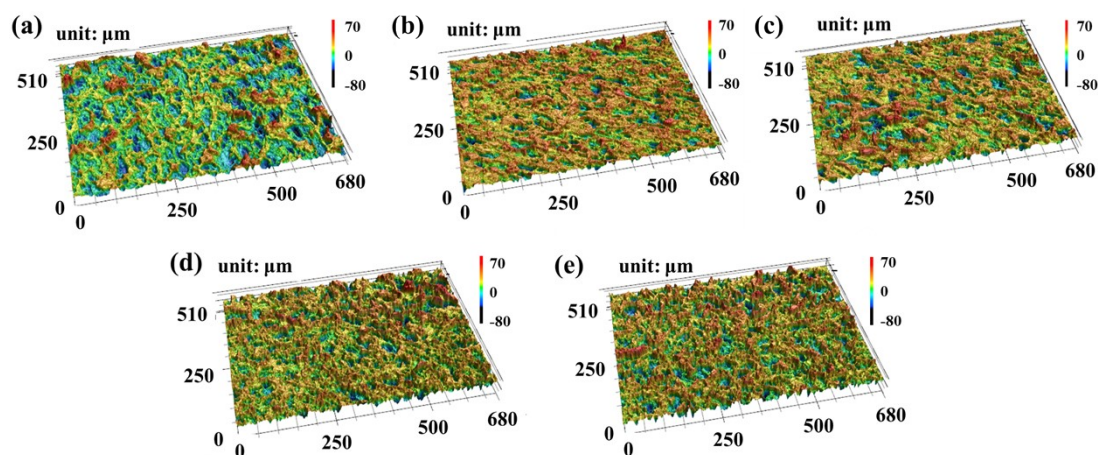

95

96 **Fig. S6** (a-e) 3D laser confocal scanning images of DR-rGO nanoscrolls-X (X=350, 450, 550, 650 and 750),

97 respectively.

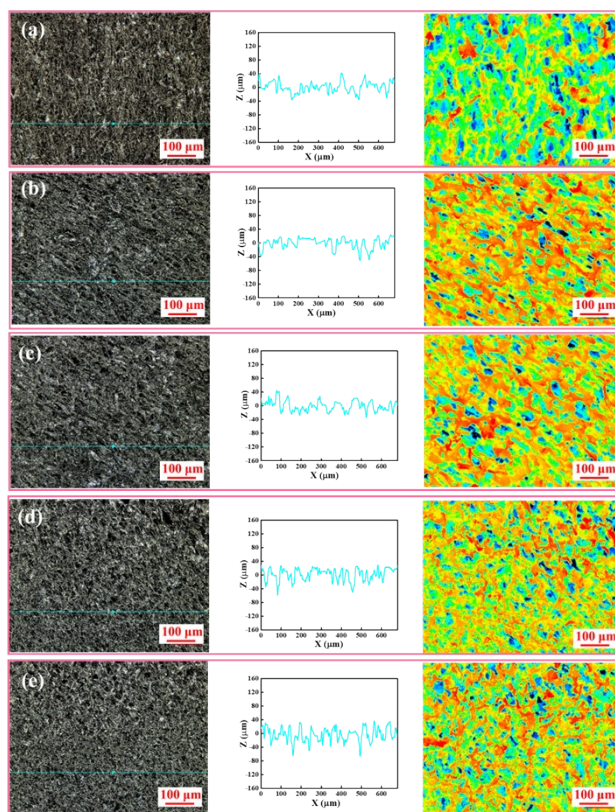

98

99 **Fig. S7** (a–e) 3D laser confocal scanning images, the respective roughness line profiles of DR-rGO nanoscrolls-X  
 100 (X=350, 450, 550, 650 and 750), respectively. We used the probe line that vertically intersects the interface along  
 101 the direction of blue line.

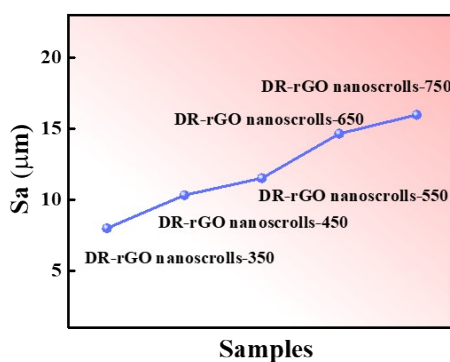

102

103 **Fig. S8** The arithmetic mean height ( $S_a$ ) of DR-rGO nanoscrolls-X (X=350, 450, 550, 650 and 750).

104 The interfacial structures of these aerogels were further analyzed by roughness  
 105 measurement.<sup>1,2</sup> The roughness tracing line profiles of all samples showed the  
 106 characteristics of up and down oscillations within  $\pm 40 \mu\text{m}$  (Fig. S7), indicating that their  
 107 macrostructures were void-rich.

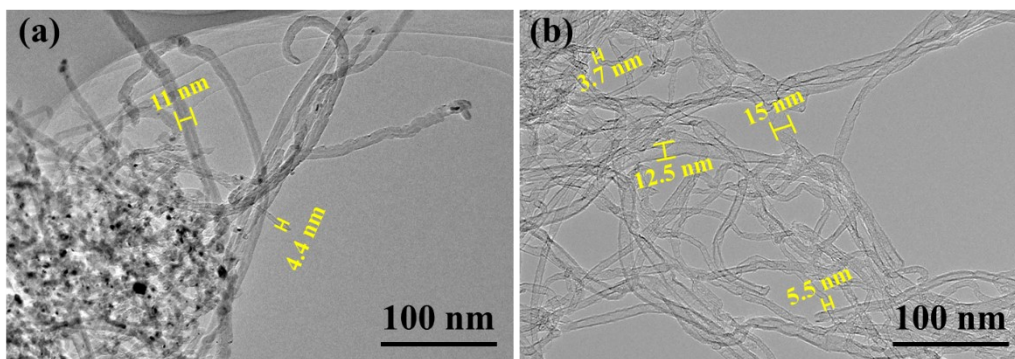

108

109 **Fig. S9** (a) TEM image of CNTs before acidification and washing process, containing a small amount of metal

110 nanoparticles. (b) TEM image of CNTs used to be involved in nanoscrolls, showing no magnetic impurities after

111 acidification and the washing process.

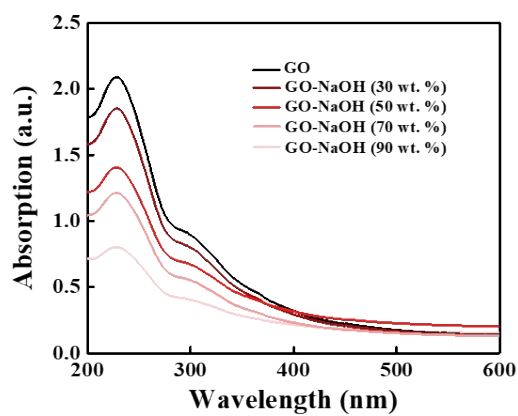

112

113 **Fig. S10** UV-Vis spectra of GO suspension with different content of NaOH.



114 **Note S1: Derjaguin-Landau-Verwey-Overbeek (DLVO) theory**

115 
$$\Phi_{\text{Total}} = \Phi_{\text{vdw}} + \Phi_{\text{EDL}} \quad (\text{S1})$$

116 
$$\Phi_{\text{vdw}} = -\frac{A}{12\pi h^2} \quad (\text{S2})$$

117 
$$\Phi_{\text{EDL}} = \varepsilon_0 \varepsilon_w k \psi^2 \left[ \frac{1}{\sinh(kh)} + 1 - \coth(kh) \right] \quad (\text{S3})$$

118 
$$k^{-1} = \sqrt{\frac{\varepsilon_0 \varepsilon_w k_B T}{2 N_A e^2 I}} \quad (\text{S4})$$

119 The aqueous solution of GO is a colloidal solution essentially.<sup>3</sup> Therefore, the  
120 phenomenon of aggregation and separation can be analyzed by DLVO theory.<sup>4</sup> The  
121 total potential energy ( $\Phi_{\text{Total}}$ ) is equal to the attractive van der Waals interaction ( $\Phi_{\text{vdw}}$ )  
122 plus the repulsive electrostatic double-layer interaction ( $\Phi_{\text{EDL}}$ ). The van der Waals  
123 interaction was calculated by the equation (S2). Electro-static double-layer interaction  
124 can be calculated by equation (S3). Debye reciprocal length  $k$  ( $\text{nm}^{-1}$ ) can be calculated  
125 by equation (S4).

126  $A$  is the Hamaker constant ( $6.26 \times 10^{-21}$  J);  $h$  is the separation distance between two  
127 particles;  $\varepsilon_0$  is the vacuum permittivity ( $8.854 \times 10^{-12}$  C V<sup>-1</sup> m<sup>-1</sup>),  $\varepsilon_w$  is the relative  
128 dielectric permittivity of water (78.5); The zeta potential value was used to replace the  
129 surface potential approximately.  $k_B$  is Boltzmann's constant ( $1.38064852 \times 10^{-23}$  J K<sup>-1</sup>);  
130  $T$  is the temperature (300 K),  $N_A$  is the Avogadro number ( $6.022140857 \times 10^{23}$  mol<sup>-1</sup>),  $e$   
131 is the electron charge ( $1.6021766208 \times 10^{-19}$  C), and  $I$  is ionic strength in the unit of mol  
132 L<sup>-1</sup>.

133

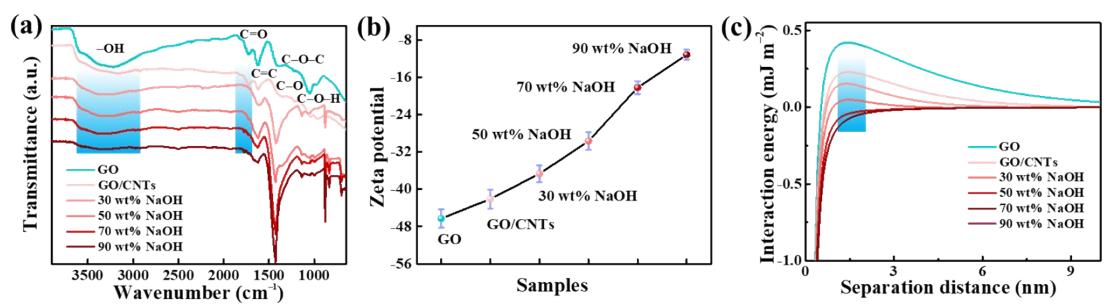

134

135 **Fig. S11** (a) FTIR spectra of GO-based aerogel with different NaOH contents, (b) Zeta potential and (c) DLVO

136 interaction profiles of GO sheets with different NaOH contents. The data in Fig. S11b shows mean  $\pm$  SD of test

137 solution at steady state. The error bars represent the standard deviation of the measured data and reflect the

138 measurement accuracy.

139 FTIR spectra revealed the changes of functional groups in aerogel after freeze-

140 drying. As shown in Fig. S11a, after the addition of NaOH, the absorption peaks located

141 at 3370 cm<sup>-1</sup>, 1736 cm<sup>-1</sup>, 1210 cm<sup>-1</sup>, and 848 cm<sup>-1</sup> got weakened, indicating that

142 oxygen-containing groups in the scroll were reduced, proving that NaOH has a weak

143 reduction effect on GO.<sup>5,6</sup> The higher the concentration of hydroxide is, the more

144 obvious the reduction effect is.

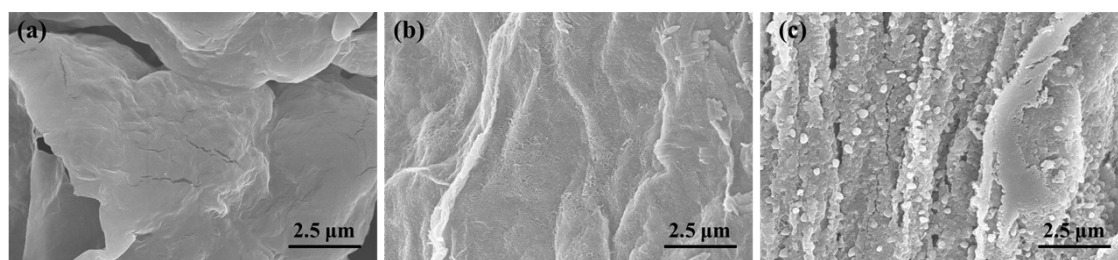

145

146 **Fig. S12** SEM images of GO aerogels under different NaOH contents: (a) 30 wt%, (b) 70 wt%, and (c) 90 wt%.

147

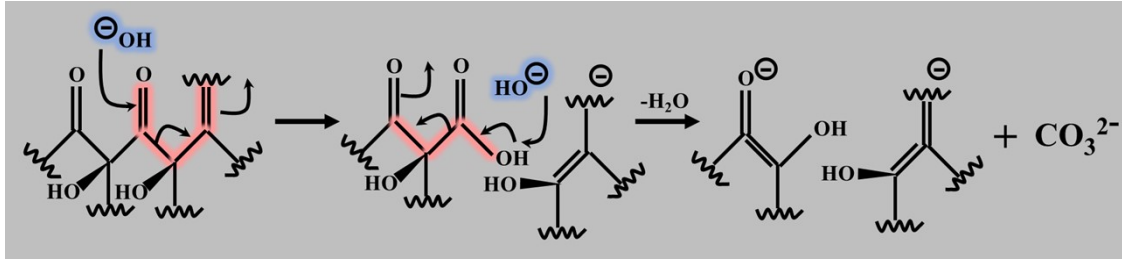

148

149 **Fig. S13** Schematic showing the decarboxylation of GO under mild alkaline conditions.

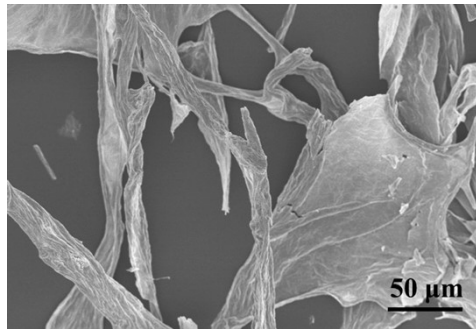

150

151 **Fig. S14** SEM image of GO nanoscrolls aerogel through refrigerator freezing.

152

153 **Note S2: Electron paramagnetic resonance (EPR) spectra and Brillouin function**

154 EPR spectra of free radicals are usually characterized by a single wide resonance.<sup>7</sup>

155 In this case, it is possible to obtain the  $g$  value, line width, and spin concentration. The

156  $g$  value of the EPR spectrum can be used to determine whether the radical is a carbon

157 center, carbon-centered with adjacent oxygen atoms, or oxygen-centered.<sup>8</sup> The

158 fundamental equation:

159 
$$E = h\nu = g\beta_e B_0 \quad (\text{S5})$$

160 Where defines the value of  $g$ , where  $h$  is Planck constant,  $\nu$  is the constant microwave

161 frequency applied in the experiment,  $\beta_e$  is the Bohr magneton, and  $B_0$  is the resonant

162 magnetic field. The  $g$  value of free electrons is 2.00232. The change of  $g$  value is related

163 to the magnetic interaction, involving the orbital angular momentum of unpaired

164 electrons and their chemical environment.

165 The  $M-H$  curve is fitted using the Brillouin function.<sup>9</sup>

166 
$$M = NgJ\mu_B \left[ \frac{2J+1}{2J} \coth\left(\frac{2J+1}{2J}x\right) - \frac{1}{2J} \coth\left(\frac{x}{2J}\right) \right] \quad (\text{S6})$$

167 where  $x = gJ\mu_B H / k_B T$ ,  $g$  is the Landau factor which is assumed to be 2,  $J$  is the angular

168 momentum number,  $N$  is the number of spins, and  $k_B$  is the Boltzmann constant.

169 Fitting the  $M-H$  curve by Brillouin function, the spin density can be obtained. The spin

170 density values of DR-rGO nanoscrolls-X can be deduced (Fig. S17d), which are

171  $2.32 \times 10^{19}$ ,  $2.39 \times 10^{19}$ ,  $3.77 \times 10^{19}$ ,  $1.86 \times 10^{19}$ , and  $1.73 \times 10^{19}$  spins  $\text{g}^{-1}$ , respectively.

172 Therefore, the spin density fitted by Brillouin function is in good agreement with the

173 experimental results of EPR, which further indicates that the magnetic moment comes

174 from the unpaired spin.

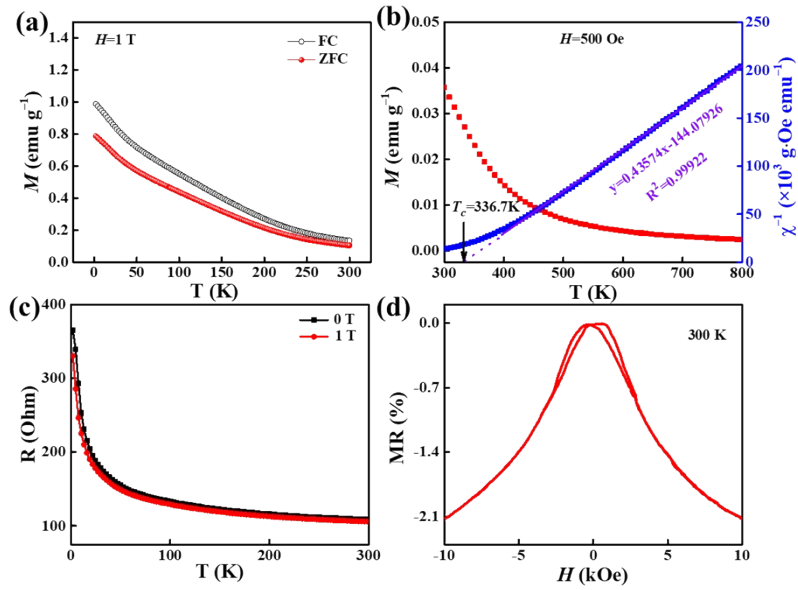

175

176 **Fig. S15** (a) Field cooled (FC) and zero field cooled (ZFC) curves of DR-rGO nanoscrolls-550 at 2~300 K under  
 177 applied field  $H=1$  T. (b) Temperature dependence of magnetization ( $M$ - $T$ ) and the inverse susceptibility in the  
 178 300~800 K with a measured field for 500 Oe of DR-rGO nanoscrolls-550. It obeys Curie-Weiss law above 336.7 K  
 179 and has more than 99 % reliability. (c) Temperature-dependent resistance under 0 T and 1 T magnetic fields at the  
 180 temperature range from 2 K to 300 K for DR-rGO nanoscrolls-550. (d) The field dependent MR for DR-rGO  
 181 nanoscrolls-550 at 300 K.

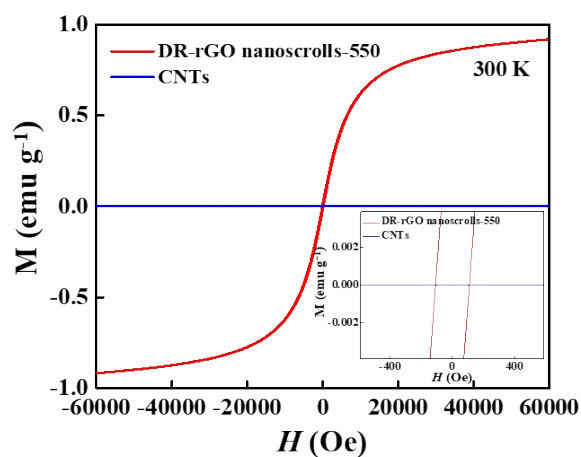

182

183 **Fig. S16**  $M-H$  curves measured at 300 K. The red line represents the DR-rGO nanoscrolls-550. Blue line represents  
 184 the CNTs used to be involved in nanoscrolls. The inset shows the  $M-H$  curves in a narrow scale for better perception.

185 The CNTs were polished by an acid treatment and washing process to remove the  
 186 residual metal nanoparticles. 2 g CNTs were added into  $\text{HNO}_3/\text{H}_2\text{SO}_4$  (1/3, v/v) mixture  
 187 with sonication treatment for 30 min. The mixture was then refluxed at 343 K for 4 h.  
 188 After cooling, the mixing solution was repeatedly washed with DI water until the pH  
 189 reached  $\sim 7$ .

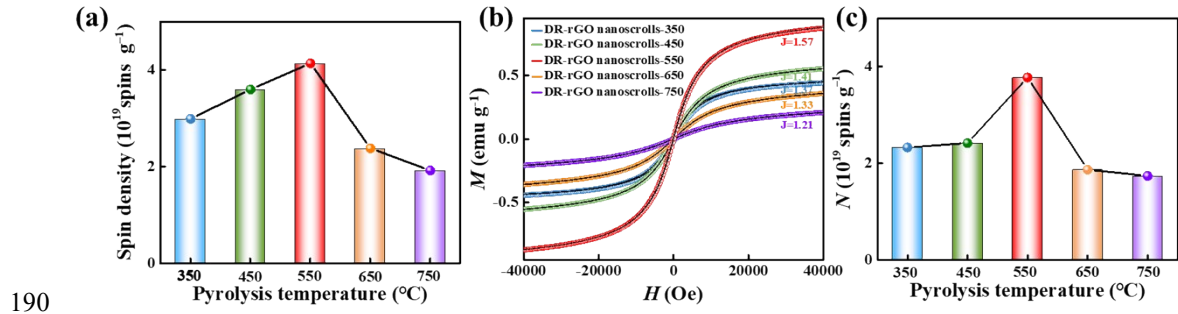

191 **Fig. S17** (a) Spin density of DR-rGO nanoscrolls-X (X=350, 450, 550, 650 and 750) from EPR spectrometer. (b)  $M$ -  
 192  $H$  curve measured at 300 K. Symbols are the measurements and black solid curve is fit to the Brillouin function with  
 193  $g=2$ . (c) Spin density extracted from the Brillouin fits.

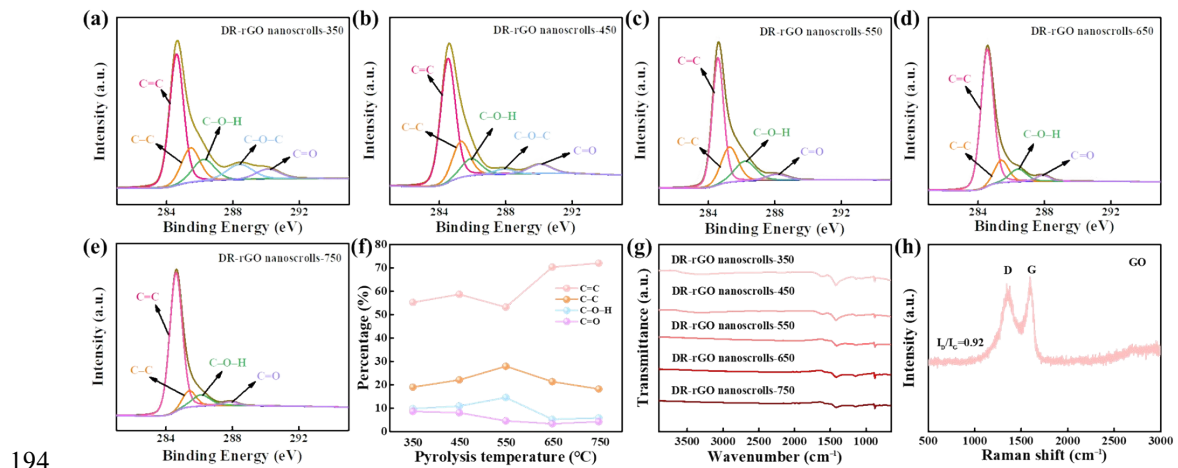

195 **Fig. S18** (a-e) High-resolution C1s XPS spectra of DR-rGO nanoscrolls-X (X=350, 450, 550, 650 and 750),  
 196 respectively. (f) Comparison of C=C, C-C, C-O-H, and C=O content in DR-rGO nanoscrolls-X (X=350, 450, 550,  
 197 650 and 750). C-O of DR-rGO nanoscrolls-350/450 contain two components (C-O-H and C-O-C). C-O of DR-  
 198 rGO nanoscrolls-550/650/750 contain a single component (C-O-H). (g) FTIR spectra of DR-rGO nanoscrolls-X  
 199 (X=350, 450, 550, 650 and 750). (h) Raman spectra of original GO.

200 As shown in Fig.2i and Fig. S18a,b, DR-rGO nanoscrolls-350/450 can be  
 201 deconvoluted into five peaks (C=C  $sp^2$ , C-C  $sp^3$ , C-O-H, C-O-C, and C=O). As for  
 202 DR-rGO nanoscrolls-550/650/750 (Fig. S18c~e), this can be deconvoluted into 4 peaks  
 203 (C=C  $sp^2$ , C-C  $sp^3$ , C-O-H, and C=O).<sup>10</sup> The detected C- $sp^3$  peaks mean the presence

204 of intrinsic defects in these samples, and their intensity usually determines the  
205 proportion of intrinsic defects.<sup>11,12</sup> The DR-rGO nanoscrolls-550 have the highest  
206 percentage of C-sp<sup>3</sup> which not only supports the formation of numerous intrinsic  
207 defects, but also confirms that both carbonization temperature have a significant effect  
208 on C-sp<sup>2</sup>/sp<sup>3</sup> content.

209 Fig. 2j and Fig. S18h present the spectrum of DR-rGO nanoscrolls and GO with D  
210 peak, G peak, and 2D peak which are consistent with literature reports.<sup>2,14</sup> The G peak,  
211 represents the in-plane vibrational mode of the sp<sup>2</sup> carbon atom. D peak is affected by  
212 defects. I<sub>D</sub>/I<sub>G</sub> is usually used as an indicator of the lattice defect density of carbon  
213 materials. The more lattice defects are, the higher the intensity ratio of I<sub>D</sub>/I<sub>G</sub> is. It started  
214 increasing for the samples DR-rGO nanoscrolls-350. The biggest I<sub>D</sub>/I<sub>G</sub> ratio (1.02) was  
215 observed for DR-rGO nanoscrolls-550. As for DR-rGO nanoscrolls-650/750, the I<sub>D</sub>/I<sub>G</sub>  
216 values were decreased to 0.99 and 0.98, respectively. This is because defects had started  
217 mending themselves by a self-repair mechanism, where carbon adatoms acquired  
218 enough energy to fill up the vacancy, and the reconstruction of C–C bonds took place.<sup>15</sup>  
219 As all know, defects are closely related to lone pair, and they usually show magnetism.<sup>16</sup>  
220 The largest I<sub>D</sub>/I<sub>G</sub> value indicates that DR-rGO nanoscrolls-550 have a higher proportion  
221 of intrinsic defects, which is in good agreement with the results of XPS and EPR.

222



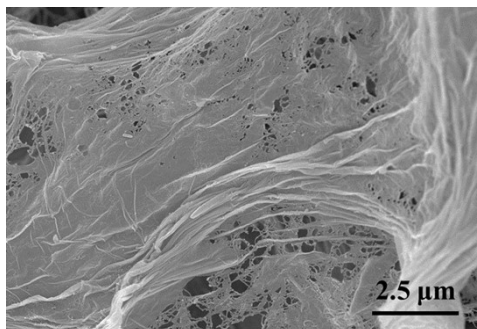

223

224 Fig. S19 SEM image of DR-rGO nanosheets-550.

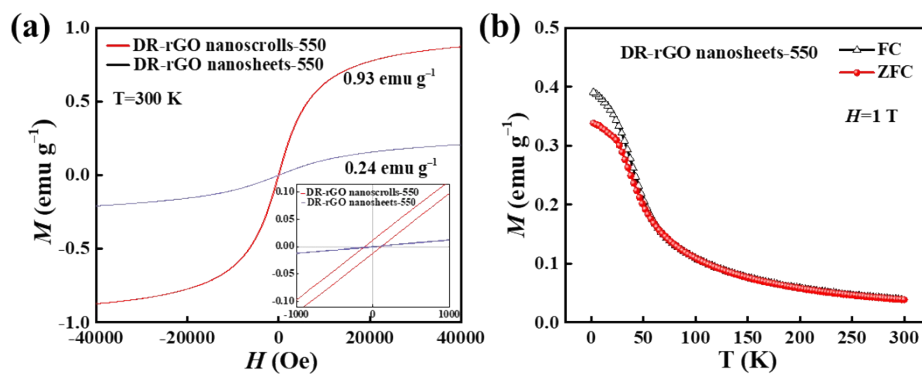

225

226 Fig. S20 (a)  $M$ - $H$  curves of DR-rGO nanoscrolls-550 and DR-rGO nanosheets-550 under static external magnetic

227 fields ranging from  $-6$  T to  $+6$  T at 300 K. The inset is the magnification of the  $M$ - $H$  curves at low magnetic fields.

228 (b) ZFC/FC curves for DR-rGO nanosheets-550 from 2 to 300 K under the applied field  $H=1$  T.

229

230 **Note S3: DFT calculation details**

231 All the calculations were carried out by the Vienna Ab initio Simulation Package  
232 (VASP5.4.4).<sup>17</sup> The electron exchange-correlation was processed within the framework  
233 of generalized gradient approximation (GGA) in the Perdew–Burke–Ernzerhof (PBE)  
234 parametrization.<sup>18</sup> The electron-ion interaction was described using the projected  
235 augmented wave (PAW) method. The plane-wave cutoff energy was set to be 600 eV.  
236 To avoid the interactions between periodic images, a vacuum space of 15 Å along c  
237 directions was set for the slab. The Brillouin zone integrations were performed with  
238  $2 \times 1 \times 1$  (structure optimization) and  $6 \times 3 \times 3$  (density of states) G point- centred k-point  
239 Monkhorst-Pack meshes. The convergence criterion wave cutoff was set to  $10^{-5}$  eV.  
240 Blue and yellow isosurfaces represent positive ( $0.007 \text{ e \AA}^{-3}$ ) and negative ( $0.001 \text{ e \AA}^{-3}$ )  
241 spin densities, respectively. In addition, the structure models were visualized in the  
242 VESTA software.

243

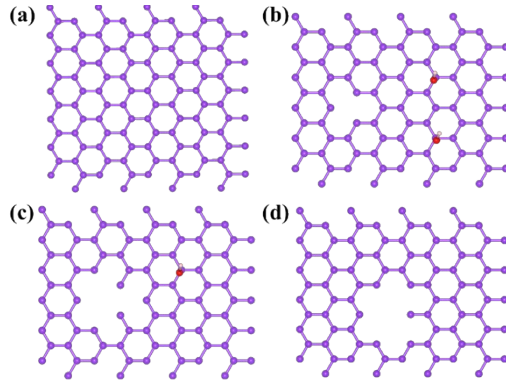

244

245 **Fig. S21** Calculation model. (a) Pristine graphene. (b) Defective graphene with two hydroxy (removed one carbon

246 atom). (c) Defective graphene with one hydroxy (removed four carbon atoms). (d) Defective graphene with the

247 number of removed five carbon atoms. The purple, red, and white colours represent carbon, oxygen, and hydrogen

248 atoms, respectively.

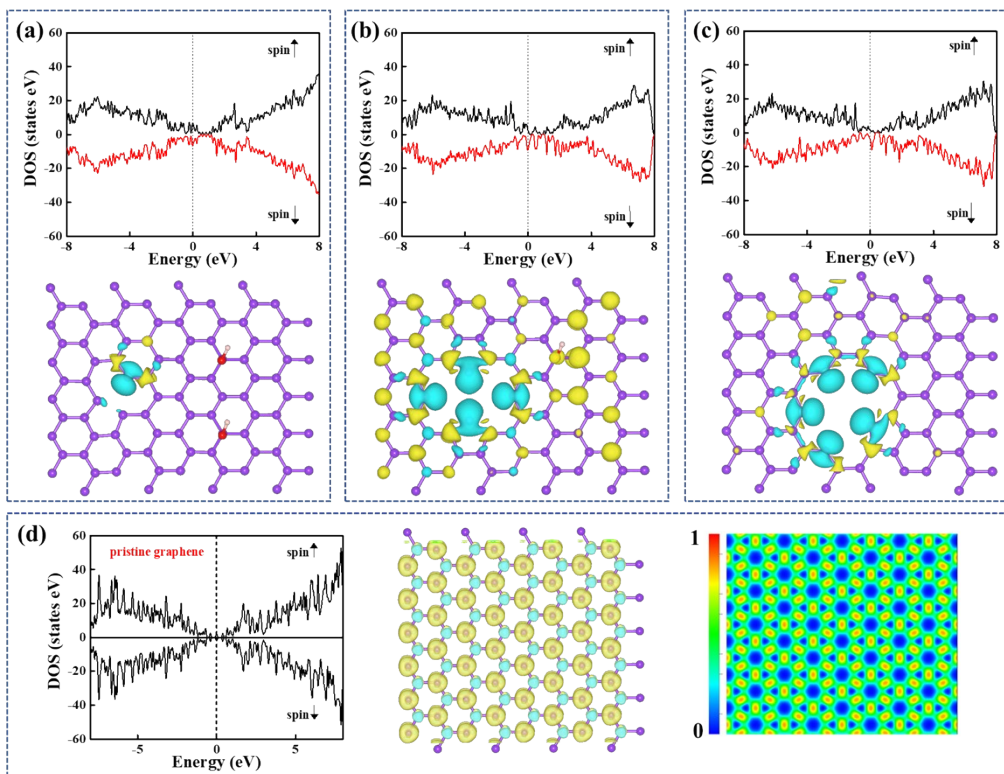

249

250 **Fig. S22** DOS plot and spatial distribution of spin density for (a) defective graphene with two hydroxy (removed

251 one carbon atom), (b) defective graphene with one hydroxy (removed four carbon atoms), and (c) defective graphene

252 with the number of removed five carbon atoms. (d) DOS plot, spatial distribution of spin density, and electron

253 localization function for pristine graphene.

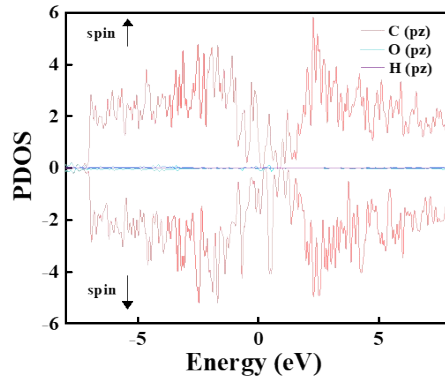

254

255 **Fig. S23** Partial densities of states for defective graphene with one hydroxy (removed four carbon atoms).

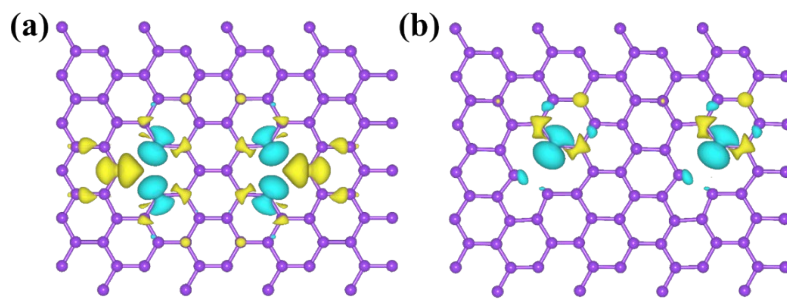

256

257 **Fig. S24** The spatial distribution of spin density for different configurations. (a) Ferromagnetism (The positions of

258 the two defects are separated by two carbon atoms). (b) Ferromagnetism (The positions of the two defects are

259 separated by three carbon atoms), indicating that the coupling depends on the relative positions.

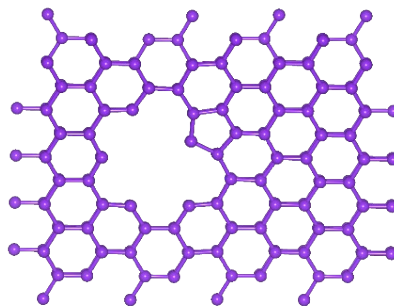

260

261 **Fig. S25** Calculation model of bilayer defective graphene (removed four carbon atoms).

262

263 **Note S4: Electromagnetic wave (EMW) absorption**

264 For the investigation of EMW attenuation properties, electromagnetic parameters  
 265 were measured by the coaxial method. The melted paraffin quickly infiltrates and  
 266 penetrated into the 3D structure by capillary action, and then presses into a ring with an  
 267 outer diameter of 7 mm and an inner diameter of 3 mm. The EMW absorption  
 268 performance was evaluated based on the transmission line theory,<sup>19,20</sup> as shown in the  
 269 following equation:

$$270 \quad \text{RL(dB)} = 20 \lg \left| \frac{Z_{\text{in}} - Z_0}{Z_{\text{in}} + Z_0} \right| \quad (\text{S7})$$

$$271 \quad Z_{\text{in}} = Z_0 \sqrt{\frac{\mu_r}{\varepsilon_r}} \tanh \left[ j \frac{2\pi f d}{c} \sqrt{\mu_r \varepsilon_r} \right] \quad (\text{S8})$$

$$272 \quad Z_0 = \sqrt{\frac{\mu_0}{\varepsilon_0}} \quad (\text{S9})$$

$$273 \quad \alpha = \left( \frac{\sqrt{2\pi f}}{c} \right) \sqrt{(\mu'' \varepsilon'' - \mu' \varepsilon') + \sqrt{(\mu'' \varepsilon'' - \mu' \varepsilon')^2 + (\varepsilon' \mu'' + \varepsilon'' \mu')^2}} \quad (\text{S10})$$

274 where  $Z_{\text{in}}$ ,  $Z_0$ ,  $f$ ,  $c$ ,  $\varepsilon_r$ , and  $\mu_r$  is input impedance, the impedance of the air, microwave  
 275 frequency, the velocity of light in free space, and the relative permittivity and  
 276 permeability, respectively. The EMW absorption mechanism could be clarified by  
 277 analyzing the complex permittivity ( $\varepsilon_r = \varepsilon' - j\varepsilon''$ ) and complex permeability ( $\mu_r = \mu' - j\mu''$ ).  
 278 The real parts  $\varepsilon'$  and  $\mu'$  represent the storage capability of electric and magnetic  
 279 energies, while the imaginary parts  $\varepsilon''$  and  $\mu''$  stand for the dissipation capability of  
 280 electric and magnetic energies. Generally, the microwave absorption performances are  
 281 evaluated using the reflection loss ( $\text{RL}_{\text{min}}$ ) and effective absorption bandwidth (EAB,  
 282 the bandwidth of  $\text{RL} \leq -10$  dB). Ideal impedance matching requires a  $|Z_{\text{in}}/Z_0|$  value of  
 283 1.0 that implies the complete entrance of incident electromagnetic wave into absorber.

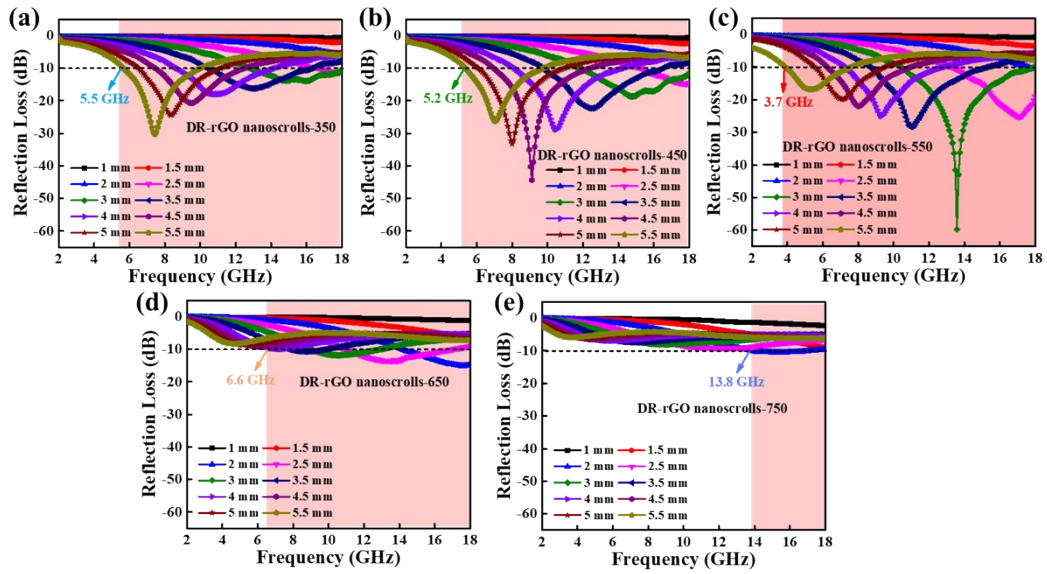

284

285 Fig. S26 (a–e) 2D RL for DR-rGO nanoscrolls-X (X=350, 450, 550, 650 and 750), respectively.

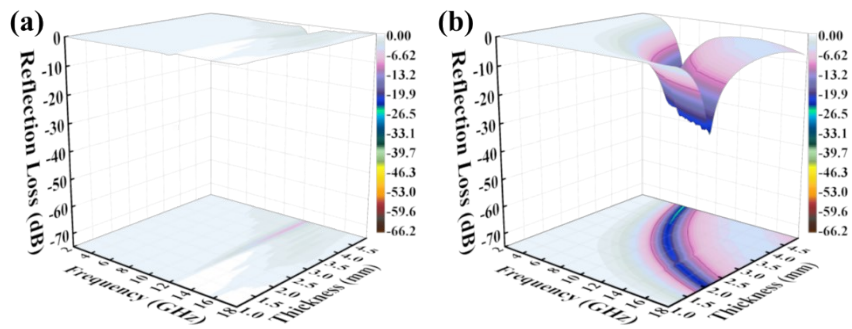

286

287 Fig. S27 3D RL for (a) defect-free GO nanoscrolls and (b) DR-rGO nanosheets-550.

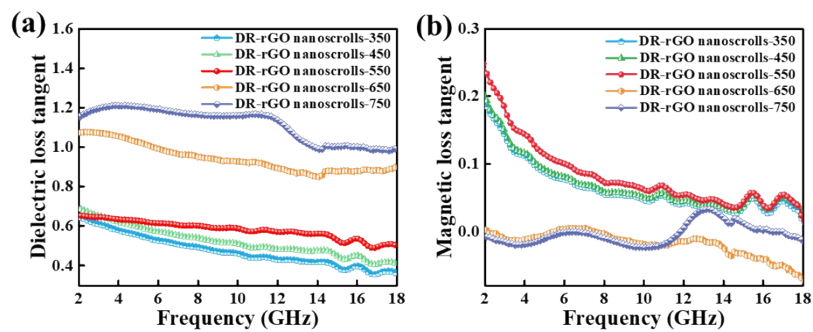

288

289 Fig. S28 (a) Dielectric loss tangent and (b) Magnetic loss tangent for DR-rGO nanoscrolls-X (X=350, 450, 550,

290 650 and 750).

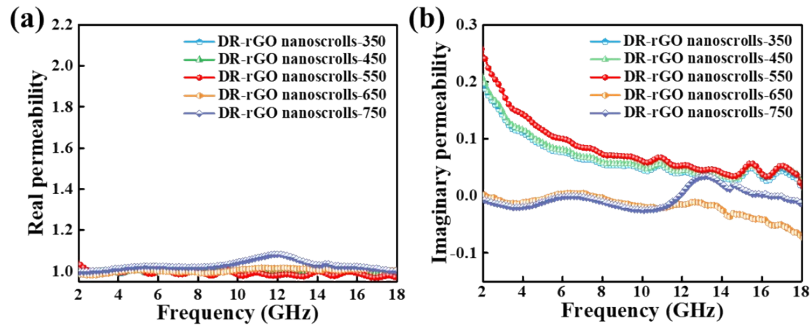

291

292 **Fig. S29** Electromagnetic parameters of DR-rGO nanoscrolls-X (X=350, 450, 550, 650 and 750). (a) Real part, (b)

293 imaginary part of the complex permeability.

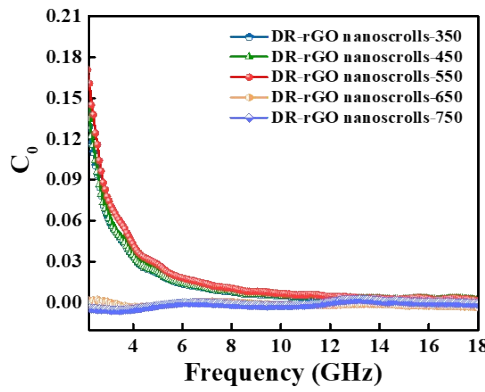

294

295 **Fig. S30** Eddy current loss ( $C_0$ ) for DR-rGO nanoscrolls-X (X=350, 450, 550, 650 and 750).

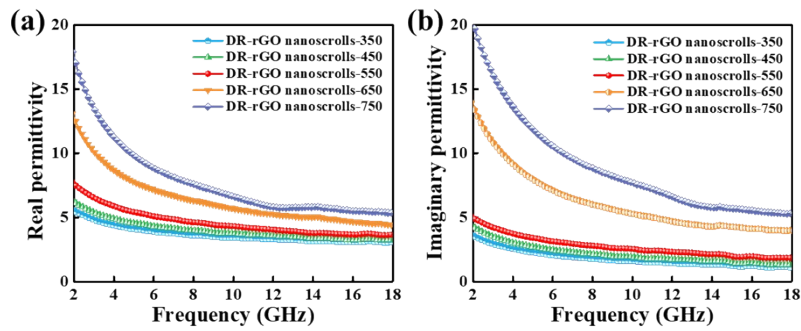

296

297 **Fig. S31** Electromagnetic parameters of DR-rGO nanoscrolls-X (X=350, 450, 550, 650 and 750): (a) Real part. (b)

298 Imaginary part of the complex permittivity.

299

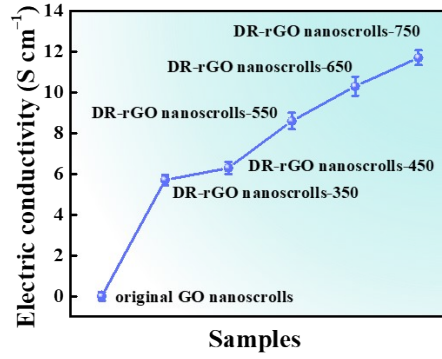

300

301 **Fig. S32** Electric conductivity for original GO nanoscrolls and DR-rGO nanoscrolls-X (X=350, 450, 550, 650 and

302 750).

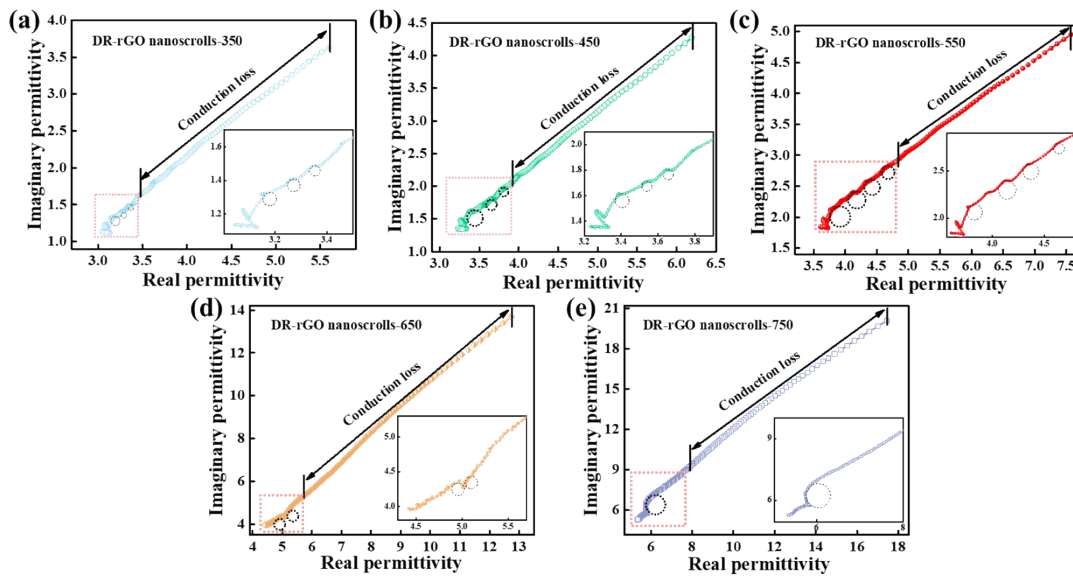

303

304 **Fig. S33** (a–e) Cole-Cole curves for DR-rGO nanoscrolls-X (X=350, 450, 550, 650 and 750), respectively. The inset

305 is the enlarged graph of the Cole-Cole curves at the lower left corner in the high-frequency region.

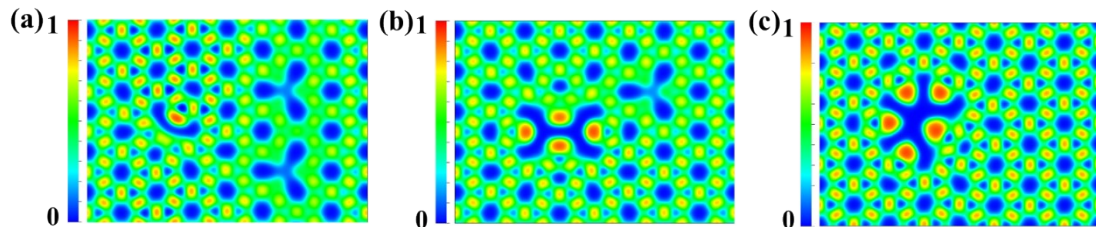

306

307 **Fig. S34** Electronic local function diagrams of (a) Defective graphene with two hydroxy (removed one carbon atom).

308 (b) Defective graphene with one hydroxy (removed four carbon atoms). (c) Defective graphene with the number of

309 removed five carbon atoms.



310 **Table S1.** Experiments with different contents of NaOH.

| NaOH/wt% | (GO+CNTs)/wt% |
|----------|---------------|
| 30       | 70            |
| 50       | 50            |
| 70       | 30            |
| 90       | 10            |

311

312 **Table S2.** Magnetic properties of graphene-based materials.

| Materials                                     | $M_s$ (emu g <sup>-1</sup> ) | Temperature  | Type of magnetism |
|-----------------------------------------------|------------------------------|--------------|-------------------|
| Co embedded N-doped graphene <sup>21</sup>    | 0.11                         | 300 K        | FM                |
| N-doped graphene <sup>22</sup>                | 1.09                         | 69 K         | FM                |
| N-doped graphene quartz fabrics <sup>23</sup> | 0.14                         | 300 K        | FM                |
| RGO <sup>24</sup>                             | 0.26                         | 9.77         | FM                |
| Graphene-600 <sup>25</sup>                    | 0.02                         | 300 K        | FM                |
| Nanomesh graphene <sup>26</sup>               | 0.04                         | 300 K        | FM                |
| Hydrogenated graphene <sup>27</sup>           | 0.006                        | -            | FM                |
| Graphene nanoribbons <sup>28</sup>            | 0.25                         | 5 K          | FM                |
| N-doped graphene <sup>29</sup>                | 0.014                        | 300 K        | FM                |
| GO nanoribbons <sup>13</sup>                  | 0.39                         | 300 K        | FM                |
| <b>DR-rGO nanoscrolls-550</b>                 | <b>0.93</b>                  | <b>300 K</b> | <b>FM</b>         |

313

314 **Table S3.** Concentrations of the selected metals in the DR-rGO nanoscrolls samples, as determined by ICP-MS.

| Sample                 | Fe (ppm) | Co (ppm) | Ni (ppm) | Mn (ppm) |
|------------------------|----------|----------|----------|----------|
| DR-rGO nanoscrolls-350 | 9.76     | 2.52     | 10.01    | 8.87     |
| DR-rGO nanoscrolls-450 | 7.63     | 5.43     | 8.21     | 5.33     |
| DR-rGO nanoscrolls-550 | 7.17     | 8.75     | 13.10    | 9.13     |
| DR-rGO nanoscrolls-650 | 11.32    | 9.77     | 10.67    | 13.78    |
| DR-rGO nanoscrolls-750 | 10.23    | 6.16     | 10.24    | 9.18     |

315

316 **Table S4.** Performance comparison of the different EMW absorption materials.

| Materials                                                            | RL <sub>min</sub> | EAB        | Thickness  | Filler loading |
|----------------------------------------------------------------------|-------------------|------------|------------|----------------|
| Nitrogen-doped graphene <sup>30</sup>                                | -11.3             | 2.1        | 3          | 30             |
| RGO@anthraquinone <sup>31</sup>                                      | -54.2             | 7.0        | 3          | 10             |
| N-doped rGO@CNTs <sup>32</sup>                                       | -49.4             | 7.1        | 1.4        | 2              |
| N/B co-doped rGO <sup>33</sup>                                       | -52.0             | 6          | 2.8        | 5              |
| PANi/ND <sup>34</sup>                                                | -46.0             | 12         | 4.3        | -              |
| Peel-based carbon aerogel <sup>35</sup>                              | -29.5             | 5.8        | 1.7        | 20             |
| WC/carbon composites <sup>36</sup>                                   | -55.6             | 4.9        | 1.5        | 45             |
| MXene/magnetic CNTs <sup>37</sup>                                    | -51.98            | 7.76       | 1.9        | 14.2           |
| NbS <sub>2</sub> <sup>38</sup>                                       | -43.85            | 6.48       | 2.07       | 40             |
| ACET filled NiCu-MOFs <sup>39</sup>                                  | -40.54            | 5.87       | 2.5        | 40             |
| Fe/Fe <sub>3</sub> O <sub>4</sub> @C <sup>40</sup>                   | -55.4             | 4.2        | 3          | 50             |
| Ferrite crystallites/Fe <sup>41</sup>                                | -53.5             | 8          | 2          | 50             |
| Ti <sub>3</sub> C <sub>2</sub> T <sub>x</sub> MXene@Ni <sup>42</sup> | -59.6             | 4.48       | 1.5        | -              |
| Co/chitosan-GO <sup>43</sup>                                         | -45.02            | 4.02       | 1.5        | 30             |
| N-Doped Co/C <sup>44</sup>                                           | -42.3             | 5.1        | 1.9        | -              |
| Metal single atoms <sup>45</sup>                                     | -46.2             | 4.7        | -          | 10             |
| MoS <sub>2</sub> /MXene aerogel <sup>46</sup>                        | -61.65            | 5.9        | 4.53       | -              |
| Co <sub>1.29</sub> Ni <sub>1.71</sub> O <sub>4</sub> <sup>47</sup>   | -50.7             | 4.84       | 1.6        | 50             |
| MnO@N-doped CNTs <sup>48</sup>                                       | -62.8             | 5.4        | 2.4        | 60             |
| graphene aerogel fibers <sup>10</sup>                                | -27.9             | 9.69       | 2.5        |                |
| Fe/Fe <sub>3</sub> C <sup>49</sup>                                   | -46.0             | 3.76       | 2.9        | 30             |
| Ceramic metamaterials <sup>50</sup>                                  | -36.33            | 6.8        | 1.9        | 35             |
| SiCO coated BN <sup>51</sup>                                         | -55.6             | 8.7        | 4          | 1              |
| NiO/NiCo <sub>2</sub> O <sub>4</sub> <sup>52</sup>                   | -48.1             | 5.84       | 1.86       | 50             |
| Glass microspheres@Co <sub>2</sub> SiO <sub>4</sub> <sup>53</sup>    | -46.7             | 5.92       | 2.9        | 20             |
| NiAl-LDH/graphene <sup>54</sup>                                      | -41.5             | 4.4        | 1.4        | 7              |
| <b>DR-rGO nanoscrolls-550</b>                                        | <b>-62.1</b>      | <b>7.8</b> | <b>3.0</b> | <b>3</b>       |

318 **Table S5.** Performance comparison of graphene-based dielectric materials.

| Materials                                      | RL <sub>min</sub> | EAB        | Thickness  | Filler loading |
|------------------------------------------------|-------------------|------------|------------|----------------|
| Graphene Nanocages <sup>55</sup>               | -51.1             | 4.4        | 1.45       | 25             |
| Hollow graphene aerogel <sup>56</sup>          | -52.7             | 9.3        | 2.3        | 5              |
| N-Doping porous graphene aerogel <sup>57</sup> | -56.4             | 6.8        | 2.35       | 6              |
| Porous graphene sheet <sup>58</sup>            | -56.4             | 6.4        | 3.0        | 4              |
| Defective graphene <sup>59</sup>               | -43.11            | 6.4        | 5.0        | 0.52           |
| WS <sub>2</sub> /CNT-rGO <sup>60</sup>         | -56.63            | 3.84       | 1.15       | 30             |
| RGO@ANF <sup>61</sup>                          | -56.5             | 7.0        | 2.8        | 1.7            |
| N-BCMT/RGO <sup>62</sup>                       | -55.45            | 8.36       | 3.2        | 2              |
| SiC/multilayer graphene <sup>63</sup>          | -53.62            | 0.82       | 2.0        | 20             |
| Graphene nanoribbon/PVDF foams <sup>64</sup>   | -54.1             | 2.8        | 5.17       | 15             |
| Porous rGO/BN/SiC <sup>65</sup>                | -37.8             | 5.9        | 2.9        | 8              |
| MW-rGO <sup>66</sup>                           | -54.11            | 5.68       | 2          | 5              |
| Graphene aerogels <sup>67</sup>                | -52.6             | 7.65       | 4.8        | 3              |
| RGO/GDY <sup>68</sup>                          | -58               | 4.3        | 1.9        | 27.5           |
| <b>DR-rGO nanoscrolls-550</b>                  | <b>-62.1</b>      | <b>7.8</b> | <b>3.0</b> | <b>3</b>       |

319

## 320 References

- 321 1 C. Luo, H. Zheng, L. Wang, H. Fang, J. Hu, C. Fan, Y. Cao and J. Wang, *Angew. Chem. Int. Ed.*,  
322 2010, 49, 9145–9148.
- 323 2 H. Liu, T. Xu, C. Cai, K. Liu, W. Liu, M. Zhang, H. Du, C. Si and K. Zhang, *Adv. Funct. Mater.*, 2022,  
324 32, 2113082.
- 325 3 B. Sun, Y. Zhang, W. Chen, K. Wang and L. Zhu, *Environ. Sci. Technol.*, 2018, 52, 7212–7219.
- 326 4 H. Tang, Y. Zhao, X. Yang, D. Liu, P. Shao, Z. Zhu, S. Shan, F. Cui and B. Xing, *Environ. Sci.*  
327 *Technol.*, 2017, 51, 9674–9682.
- 328 5 L. B. A. Ayrat M. Dimiev, and James M. Tour., *ACS Nano*, 2012, 7, 576–588.
- 329 6 S. Eigler, S. Grimm, F. Hof and A. Hirsch, *J. Mater. Chem. A*, 2013, 1, 11559–11562.
- 330 7 M. Roessler and E. Salvadori, *Chem. Soc. Rev.*, 2018, 47, 2534–2553.
- 331 8 U. Green, K. Keinan-Adamsky, S. Attia, Z. Aizenshtat, G. Goobes, S. Ruthstein and H. Cohen, *Phys.*  
332 *Chem. Chem. Phys.*, 2014, 16, 9364–9370.
- 333 9 R. Nair, M. Sepioni, I. Tsai, O. Lehtinen, J. Keinonen, A. Krashennnikov, T. Thomson, A. Geim and  
334 I. Grigorieva, *Nat. Phys.*, 2012, 8, 199–202.
- 335 10 Y. Hou, Z. Sheng, C. Fu, J. Kong and X. Zhang, *Nat. Commun.*, 2022, **13**, 1227.
- 336 11 C. Li, Z. Zhang, Y. Chen, X. Xu, M. Zhang, J. Kang, R. Liang, G. Chen, H. Lu, Z. Yu, W. J. Li, N.  
337 Wang, Q. Huang, D. Zhang, S. L. Chou and Y. Jiang, *Adv. Sci.*, 2022, **9**, e2104780.
- 338 12 H. Sun, L. Mei, J. Liang, Z. Zhao, C. Lee, H. Fei, M. Ding, J. Lau, M. Li, C. Wang, X. Xu, G. Hao,  
339 B. Papandrea, I. Shakir, B. Dunn, Y. Huang and X. Duan, *Science*, 2017, **356**, 599–604.
- 340 13 L. Fu, Y. Wang, K. Zhang, W. Zhang, J. Chen, Y. Deng, Y. Du and N. Tang, *ACS Nano*, 2019, **13**,  
341 6341–6347.
- 342 14 Y. Xu, C. Y. Chen, Z. Zhao, Z. Lin, C. Lee, X. Xu, C. Wang, Y. Huang, M. I. Shakir and X. Duan,  
343 *Nano Lett.*, 2015, **15**, 4605–4610.
- 344 15 B. Song, G. F. Schneider, Q. Xu, G. Pandraud, C. Dekker and H. Zandbergen, *Nano Lett.*, 2011, **11**,  
345 2247–2250.
- 346 16 J. Tucek, P. Blonski, J. Ugolotti, A. K. Swain, T. Enoki and R. Zboril, *Chem. Soc. Rev.*, 2018, **47**,  
347 3899–3990.
- 348 17 J. F. G. Kresse, *Phys. Rev. B*, 1996, **54**, 11169–11186.
- 349 18 K. B. John P. Perdew, Matthias Ernzerhof., *Phys. Rev. Lett*, 1996, **77**, 3865–3868.
- 350 19 Y. Xia, W. Gao and C. Gao, *Adv. Funct. Mater.*, 2022, **32**, 2204591.
- 351 20 X. Wang, W. Cao, M. Cao and J. Yuan, *Adv. Mater.*, 2020, **32**, 2002112.
- 352 21 W. Hu, C. Wang, H. Tan, H. Duan, G. Li, N. Li, Q. Ji, Y. Lu, Y. Wang, Z. Sun, F. Hu and W. Yan,  
353 *Nat. Commun.*, 2021, **12**, 1854.
- 354 22 P. Blonski, J. Tucek, Z. Sofer, V. Mazanek, M. Petr, M. Pumera, M. Otyepka and R. Zboril, *J. Am.*  
355 *Chem. Soc.*, 2017, **139**, 3171–3180.
- 356 23 Y. Xie, S. Liu, K. Huang, B. Chen, P. Shi, Z. Chen, B. Liu, K. Liu, Z. Wu, K. Chen, Y. Qi and Z.  
357 Liu, *Adv. Mater.*, 2022, **34**, e2202982.
- 358 24 S. Kim, H. Kim, K. Lee, K. Roh, J. Han, K. Kim, S. Lee and M. Jung, *Carbon*, 2019, **142**, 373–378.
- 359 25 Y. Wang, Y. Huang, Y. Song, X. Zhang, Y. Ma, J. Liang and Y. Chen, *Carbon*, 2009, **9**, 220–224.
- 360 26 G. Ning, C. Xu, L. Hao, O. Kazakova, Z. Fan, H. Wang, K. Wang, J. Gao, W. Qian and F. Wei,  
361 *Carbon*, 2013, **51**, 390–396.
- 362 27 Y. Alex, P. Ling, S. Filip, M. Miroslav, M. Stanislava, S. Zdenek and P. Martin, *ACS Nano*, 2013, **7**,

363 5930–5939

364 28 S. Rao, S. Jammalamadaka, A. Stesmans, V. Moshchalkov, J. Tol, D. Kosynkin, A. Higginbotham-  
365 Duque and J. Tour, *Nano Lett.*, 2012, **12**, 1210–1217.

366 29 J. Li, X. Li, P. Zhao, D. Y. Lei, W. Li, J. Bai, Z. Ren and X. Xu, *Carbon*, 2015, **84**, 460–468.

367 30 L. Quan, F. X. Qin, D. Estevez, H. Wang and H. X. Peng, *Carbon*, 2017, **125**, 630–639.

368 31 S. Wang, K. Hu, F. Huang, M. Zhang, S. Wu, Q. Liu and X. Kong, *Carbon*, 2019, **152**, 818–826.

369 32 Z. Sun, Z. Yan, K. Yue, A. Li and L. Qian, *Appl. Surf. Sci.*, 2021, **538**, 147943.

370 33 Z. Sun, Z. Yan, K. Yue, A. Li and L. Qian, *Compos. B. Eng.*, 2020, **196**, 108132.

371 34 X. Chen, Y. Zhang, L. Tao, Q. Nie, F. Meng, S. Zhu, L. Cui and R. Huang, *Carbon*, 2020, **164**, 224–  
372 234.

373 35 W. Gu, J. Sheng, Q. Huang, G. Wang, J. Chen and G. Ji, *Nano-Micro Lett.*, 2021, **13**, 102.

374 36 Y. Lian, B. Han, D. Liu, Y. Wang, H. Zhao, P. Xu, X. Han and Y. Du, *Nano-Micro Lett.*, 2020, **12**,  
375 153.

376 37 T. Hou, Z. Jia, Y. Dong, X. Liu and G. Wu, *Chem. Eng. J.*, 2022, **431**, 133919.

377 38 H. Zhang, J. Cheng, H. Wang, Z. Huang, Q. Zheng, G. Zheng, D. Zhang, R. Che and M. Cao, *Adv.*  
378 *Funct. Mater.*, 2021, **32**, 2108194.

379 39 J. Cheng, H. Zhang, H. Wang, Z. Huang, H. Raza, C. Hou, G. Zheng, D. Zhang, Q. Zheng and R.  
380 Che, *Adv. Funct. Mater.*, 2022, **32**, 2201129.

381 40 C. Xu, P. Liu, Z. Wu, H. Zhang, R. Zhang, C. Zhang, L. Wang, L. Wang, B. Yang, Z. Yang, W. You  
382 and R. Che, *Adv. Sci.*, 2022, **9**, e2200804.

383 41 M. Huang, X. Yu, L. Wang, J. Liu, W. You, M. Wang and R. Che, *Small Structures*, 2021, **2**,  
384 2100033.

385 42 C. Wen, X. Li, R. Zhang, C. Xu, W. You, Z. Liu, B. Zhao and R. Che, *ACS Nano*, 2021, **16**, 1150–  
386 1159.

387 43 J. Xu, X. Zhang, Z. Zhao, H. Hu, B. Li, C. Zhu, X. Zhang and Y. Chen, *Small*, 2021, **17**, e2102032.

388 44 J. Liang, J. Chen, H. Shen, K. Hu, B. Zhao and J. Kong, *Chem. Mater.*, 2021, **33**, 1789–1798.

389 45 X. Zhang, Y. Shi, J. Xu, Q. Ouyang, X. Zhang, C. Zhu, X. Zhang and Y. Chen, *Nano-Micro Lett.*,  
390 2021, **14**, 27.

391 46 J. Yang, J. Wang, H. Li, Z. Wu, Y. Xing, Y. Chen and L. Liu, *Adv. Sci.*, 2022, **9**, e2101988.

392 47 D. Lan, M. Qin, J. Liu, G. Wu, Y. Zhang and H. Wu, *Chem. Eng. J.*, 2020, **382**, 122797.

393 48 D. Xu, Y. Yang, L. Lyu, A. Ouyang, W. Liu, Z. Wang, L. Wu, F. Yang, J. Liu and F. Wang, *Chem.*  
394 *Eng. J.*, 2021, **410**, 128295.

395 49 Z. Xu, Y. Du, D. Liu, Y. Wang, W. Ma, Y. Wang, P. Xu and X. Han, *ACS Appl. Mater. Interfaces*,  
396 2019, **11**, 4268–4277.

397 50 R. Zhou, Y. Wang, Z. Liu, Y. Pang, J. Chen and J. Kong, *Nano-Micro Lett.*, 2022, **14**, 122.

398 51 Y. Hou, W. Yang, C. Zhong, S. Wu, Y. Wu, F. Liu, X. Huang and G. Wen, *Chem. Eng. J.*, 2019,  
399 **378**, 122239.

400 52 M. Qin, L. Zhang, X. Zhao and H. Wu, *Adv. Sci.*, 2021, **8**, 2004640.

401 53 D. Lan, Z. Gao, Z. Zhao, G. Wu, K. Kou and H. Wu, *Chem. Eng. J.*, 2021, **408**, 127313.

402 54 X. Xu, S. Shi, Y. Tang, G. Wang, M. Zhou, G. Zhao, X. Zhou, S. Lin and F. Meng, *Adv. Sci.*, 2021,  
403 **8**, 2002658.

404 55 C. Zhang, X. Li, Y. Shi, H. Wu, Y. Shen, C. Wang, W. Guo, K. Tian and H. Wang, *Adv. Opt. Mater.*,  
405 2022, **10**, 2101904.

406 56 T. Li, D. Zhi, Y. Chen, B. Li, Z. Zhou and F. Meng, *Nano research*, 2020, **13**, 477–484.

- 407 57 R. Shu, G. Zhang, C. Zhang, Y. Wu, and J. Zhang, *Adv. Electron. Mater.*, 2021, **7**, 2001001.
- 408 58 H. Zhao, Y. Cheng, Z. Zhang, B. Zhang, C. Pei, F. Fan and G. Ji, *Carbon*, 2021, **173**, 501–511.
- 409 59 W. Yu and G. Shao, *J. Colloid Interface Sci.*, 2023, **640**, 680–687.
- 410 60 J. Zhou, J. Luo, G. Hao, F. Guo, G. Liu, H. Guo, G. Zhang, L. Xiao, Y. Hu and W. Jiang, *J. Mater. Chem. A*, 2022, **10**, 13848.
- 412 61 Q. Liu, L. Tang, J. Li, Y. Chen, Z. Xu, J. Li, X. Chen and F. Meng, *J. Mater. Sci. Technol.*, 2022, 413 **130**, 166–175.
- 414 62 P. Wu, Y. F. J. Xu, Z. Fang, Q. Liu and X. Kong, *Carbon*, 2023, **202**, 194–203.
- 415 63 S. Hao, P. Liu and H. Wang, *J. Alloys Compd.*, 2023, **947**, 169454.
- 416 64 H. Ma, X. Zhang, L. Yang, L. Ma, C. Park, P. Gong and G. Li, *Carbon*, 2023, **205**, 159–170.
- 417 65 Q. Zhang, X. You, L. Tian, M. Wang, X. Zhang, Y. Shi, J. Yang and S. Dong, *J. Mater. Sci. Technol.* 418 2023, **155**, 192–201.
- 419 66 K. Ran, W. Wang, X. Hou, Y. Huang, Z. Zhang, D. He, Y. Fang, S. Wang, R. Zhao and W. Xue, *J. Alloys Compd.*, 2022, **924**, 166568.
- 421 67 S. Shi, S. Ren, S. Hao, Y. Chen, C. Yang and S. Dai, *J. Mater. Sci.*, 2022, **57**, 453–466.
- 422 68 M. Ling, F. Wu, P. Liu, Q. Zhang and B. Zhang, *small*, 2023, **19**, 2205925.
